# Supplementary material for: A stable antimicrobial peptide with dual functions of treating and preventing citrus Huanglongbing
Source: PubMed Central journal article supplement — Proc Natl Acad Sci U S A. 2021 Feb 1;118(6):e2019628118. doi: 10.1073/pnas.2019628118 (PMC8017978; doi:10.1073/pnas.2019628118), 2021-02-01
Supplement: pnas.2019628118.sapp.pdf [file pnas.2019628118.sapp.pdf]

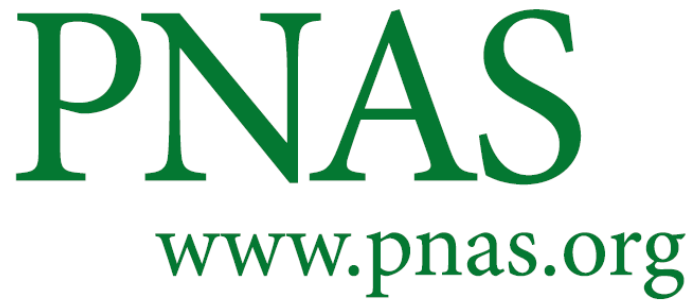

Supplementary Information for

**A stable antimicrobial peptide with dual functions of treating and preventing citrus Huanglongbing**

Chien-Yu Huang<sup>a</sup>, Karla Araujo<sup>b</sup>, Jonatan Niño Sánchez<sup>a</sup>, Gregory Kund<sup>c</sup>, John Trumble<sup>c</sup>,  
Caroline Roper<sup>a</sup>, Kristine Elvin Godfrey<sup>b</sup>, and Hailing Jin<sup>a\*</sup>

\* \*Correspondence: Hailing Jin ([hailingj@ucr.edu](mailto:hailingj@ucr.edu))

**This PDF file includes:**

**Supplementary Text**

**Materials and Methods**

**Figures S1 to S10**

**Tables S1**

## Supplementary Text

### Materials and Methods

Figure S1. Identification of SAMPs from HLB-tolerant citrus relatives.

Figure S2. The sequence alignment of identified SAMP genes in citrus and citrus-relatives.

Figure S3. Screening for the most effective SAMP using the *Nb*/CLso growth assay.

Figure S4. Pneumatic trunk injection system used to deliver solution into the vasculature of the citrus trees.

Figure S5. The defense marker genes were induced in *Nb* and tomato post MaSAMP treatment.

Figure S6. The immune responses activated by MaSAMP is dependent on *NPR1* and *SGT1*, but not BAK1.

Figure S7. The MaSAMP level in leaf midribs is negatively correlated with the CLas titer.

Figure S8. The minimum inhibitory concentration of MaSAMP is between 10  $\mu\text{M}$  to 30  $\mu\text{M}$ .

Figure S9. MaSAMP is mainly associated with the membrane fraction from *Lcr*.

Figure S10. Tripling the amount of MaSAMP-helix2 can reach 90% of the antibacterial activity of MaSAMP.

Tables S1

## **Materials and Methods**

### ***Nb* and tomato Material, CLso Inoculation**

*Nb* and tomato (*Solanum lycopersicum*, SI, ‘money maker’) plants were grown in a plant growth room at 23±1 °C with 12-h light/12-h dark photoperiod. The 10-day-old *Nb* seedlings (with 2 true leaves emerged) were exposed to 10 CLso-positive potato psyllid nymphs for five days. To detect CLso titer in *Nb* plants, 6 new leaves were collected from each plant and the plant DNA was purified following the CTAB protocol from the midvein of collected leaves (1). CLso was detected by qPCR in the plant using the primers and TaqMan probe designed against CLso 16S rDNA (SI Appendix, Table S1). The primers and probe of the positive internal control set was designed to amplify the ubiquitin gene from *Nb* (*NbUbi*). Dilutions of plasmid DNA pLso (containing the target DNA sequence from CLso in pGEM-T easy vector, Promega) were set as a standard curve for evaluating the titer of CLso.

### **MASAMP treatment on *Nb* plants with genes knockdown by VIGS**

VIGS was performed by infiltration with *A. tumefaciens* strain containing the bipartite TRV, pTRV1, and pTRV2 vectors (Liu et al., 2002). Equal volumes of *A. tumefaciens* (OD<sub>600</sub>= 0.5) suspensions carrying pTRV1 and pTRV2-*siSGT1* (2), pTRV2-*siBAK1/SERK3* (3) or pTRV2-*siRB* construct (4), then co-inoculated into the third and fourth true leaves of the *Nb* plant by infiltration with 1ml syringe. The pTRV2-*siNPR1* construct that can silence *NbNPR1* was designed by the SGN VIGS Tool (5) and the primer sets used for amplifying the fragment are shown in SI Appendix, Table S1. The leaves of inoculated plants were collected after three weeks for RNA extraction.

### **SAMP immunoprecipitation from plant tissue**

Two grams of citrus leaf tissue were frozen with liquid nitrogen and ground into a fine powder. 10ml of extraction buffer (20 mM Tris-HCl [pH7.5], 150 mM NaCl, 5 mM MgCl<sub>2</sub>, 5 mM dithiothreitol [DTT], 1% Nonidet P40, 30  $\mu$ l of plant protease inhibitor [sigma p9599]) was added to the powder. After being agitated at 4 °C for 30 minutes, the protein lysate was filtered through a 45  $\mu$ m nylon mesh and total protein amount was evaluated using Bradford reagent (BioRad). The total protein lysate was pre-incubated with 10  $\mu$ l of protein A beads (Roche) for one hour at 4°C to clean the non-specific binding of the beads. Next, 5 $\mu$ g of anti-SAMP antibodies were added to the lysate for 2 hours at 4°C. Finally, 20  $\mu$ l of protein A beads were added to the lysate for one more hour. After incubation, the protein A beads were collected by spinning and washed three times (5 min each) with 5 ml IP washing buffer (20 mM Tris-HCl [pH7.5], 150 mM NaCl, 5 mM MgCl<sub>2</sub>, 5 mM dithiothreitol [DTT], 0.5% Triton X-100, 5  $\mu$ l of plant protease inhibitor [sigma p9599]). The washed beads were resuspended in 1XSDS-loading buffer and resolved in an 18% SDS-PAGE gel. The SAMP was detected by western blot and quantified using ImageJ (7).

### **SAMP Peptide Production**

The SAMP used in this study was produced by *E. coli* or by chemical synthesis. The long and short SAMP genes were cloned into a pET28a protein expression vector using the primer list in Table S1. The N-terminal His-tag fusion SAMPs were expressed in *E. coli* strain C41(DE3) with 0.5 mM IPTG at 28 °C for 2 hours. The native protein purification

was performed using Ni-NTA Agarose (Qiagen) following the manufacture's protocol. The chemical synthetic MaSAMP, double helix hairpin (SAMP $\Delta$ N $\Delta$ C, HIFESTFESTE-GVAEYVSHPSHVEYANLFLANLEKVLVIDYK), helix1 (MaSAMP-helix1, THIFE-STFESTEGVAEYVSHP), and helix2 only (MaSAMP-helix 2, SHVEYANLFLANLE-KVLVIDYK) is >75% purity in net weight produced by GenScript or Biomatik.

### **Separation of Outer and Inner Membrane Fractions**

*Lcr* cell fractionation was carried out by using two subsequent sets of sucrose density gradients as described in Marani *et al* (6). 3L of *Lcr* cells with OD<sub>600</sub> around 0.5 were collected and resuspended in 3 mL of 200nM SAMP in 1xPBS pH7.3 and incubated at room temperature for 20 minutes. This MaSAMP-bacteria suspension was added to 3 mL of buffer K (1xPBS, 500 mM sucrose, 1 mM EDTA, 1 mM dithiothreitol [DTT], one complete ULTRA tablet[Roche]/50ml, lysozyme [Sigma] 2mg/ml, at pH 7.3), incubated on ice for 15 minutes and lysed by sonication in position 5, 6 sec ON/10 sec OFF pulses repeating for 10 times. The unbroken cells were clarified from the lysate by 20-min centrifugation at 8,000g. The supernatant was transferred to the top of two layers of sucrose gradient: 1 mL 55% (w/w) on the bottom and 5.5 mL 9% (w/w) on the top. All sucrose gradients were prepared in buffer M: 50 mM Tris-HCl, 1 mM EDTA, and 1 mM DTT (pH7.5). The gradients were spun at 200,000g for 3 h with a Beckman SW 32.Ti rotor. The membrane fraction which contained the entire membranes was collected from the top of the 55% sucrose layer. This fraction was diluted 1:1 with buffer M and transferred on top of a six-layer sucrose gradient to separate the inner and outer membrane fractions. The second gradient was as follows (from bottom to top): 1 mL at 55%; 2.0 mL at 50%, 45%, 40%, and 35%; 0.8 mL at 30% (all w/w) and 3.3 mL of the sample fraction. The gradients were spun for 18h at 200,000g in a Beckman SW 32.Ti rotor. The inner and outer

membrane fractions were collected from the top of the 40% and 50% sucrose steps, respectively.

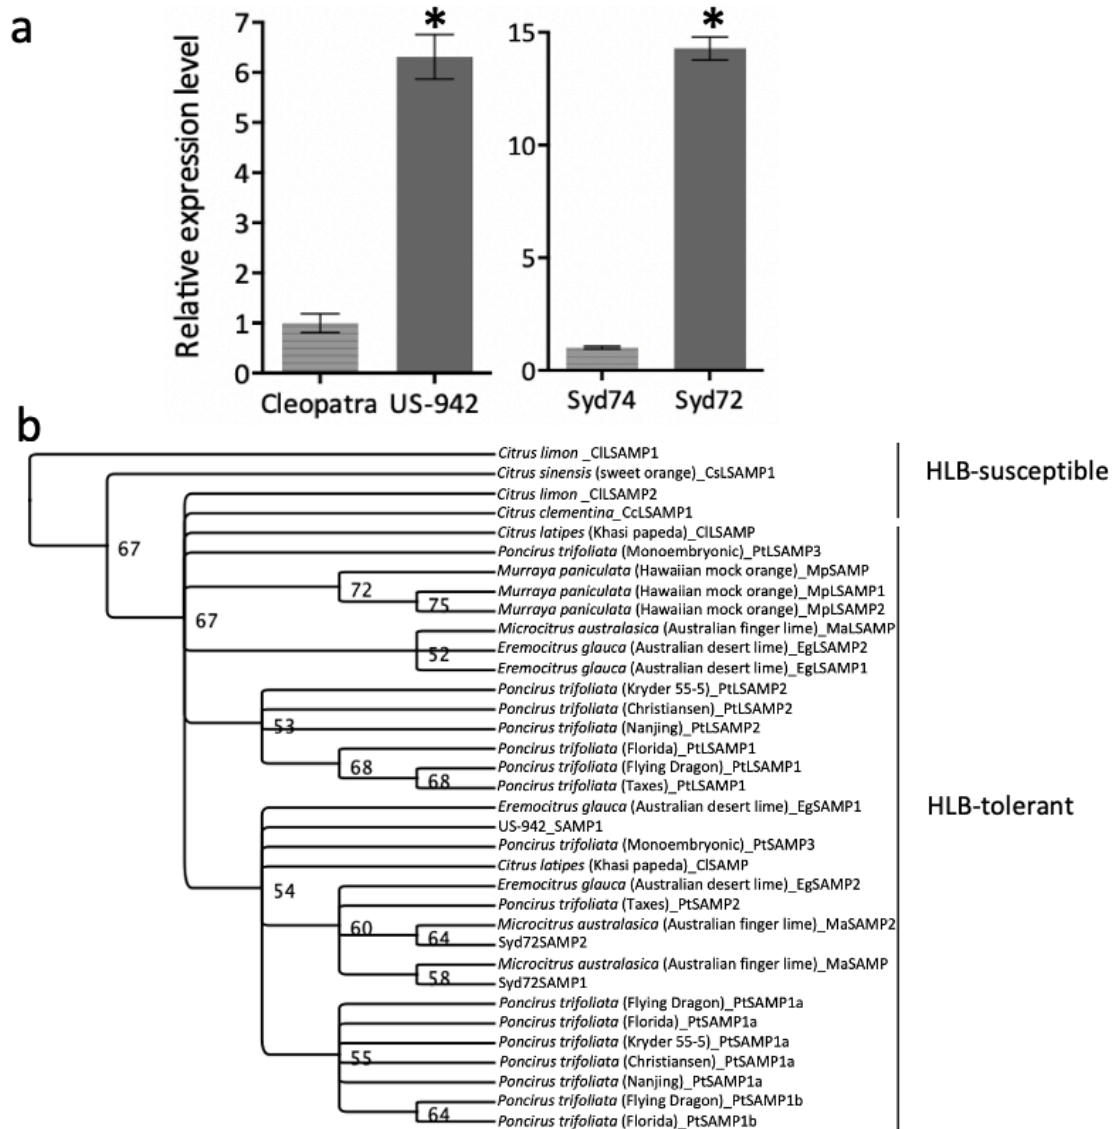

**Figure S1. Identification of SAMPs from HLB-tolerant citrus relatives.**

- a. The relative expression level of small RNA 942si1007 and *SAMP* in US-942 compared to the HLB-susceptible parental line Cleopatra, and Syd72 compared to the other HLB-susceptible hybrids Syd74. The expression level was analyzed by qRT-PCR and normalized to *Actin*. The significant difference is indicated by \*( $P < 0.05$  analyzed by t-test).
- b. The phylogenetic analysis of SAMPs cloned from different citrus and citrus-relatives collected from the Citrus Variety Collection at the University of California, Riverside.

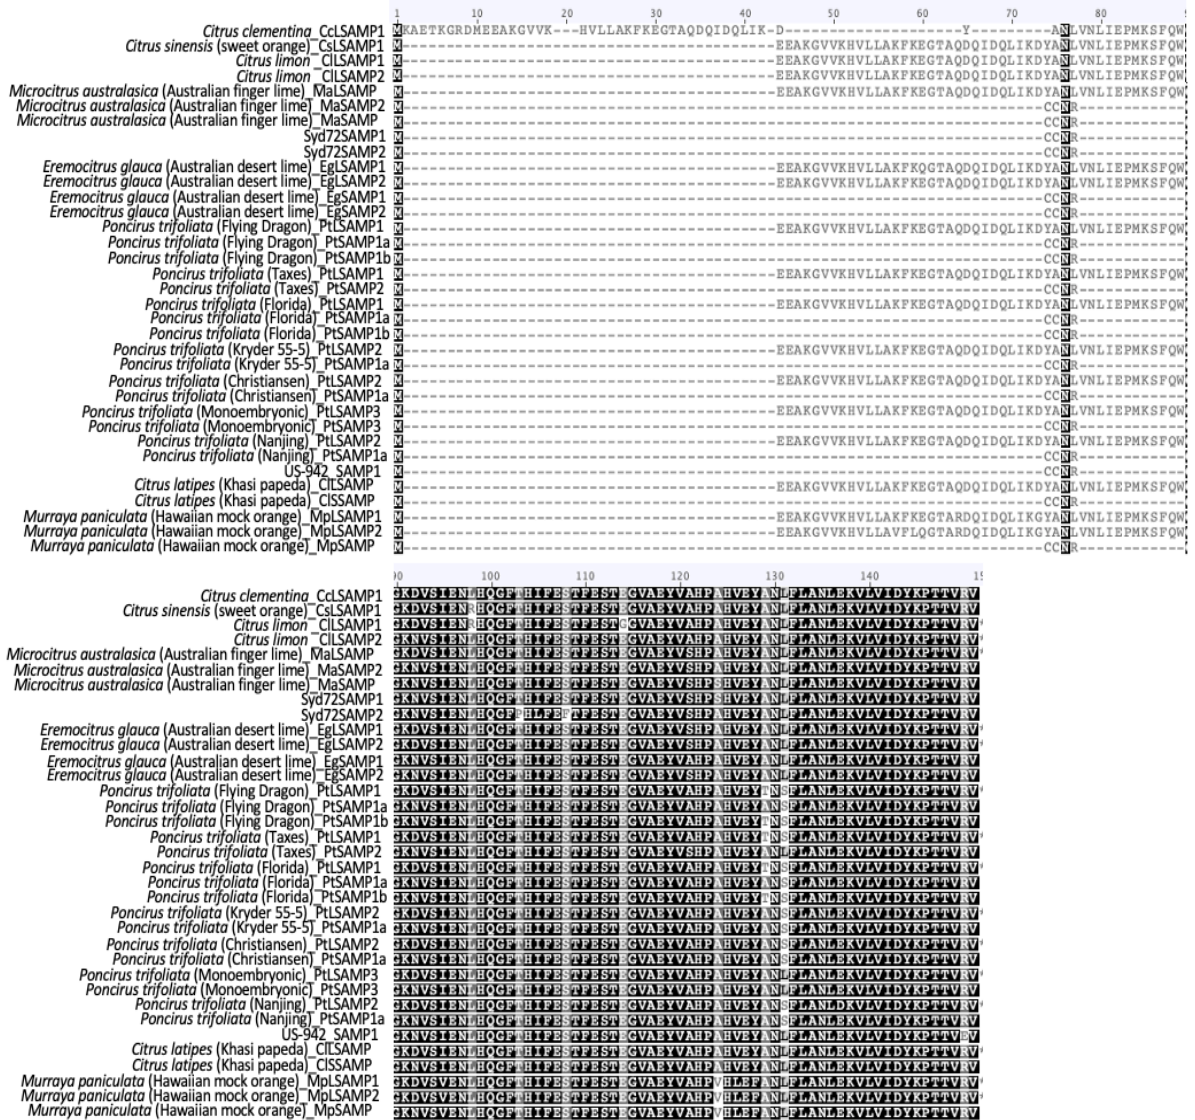

**Figure S2. The sequence alignment of identified SAMP genes in citrus and citrus-relatives.**



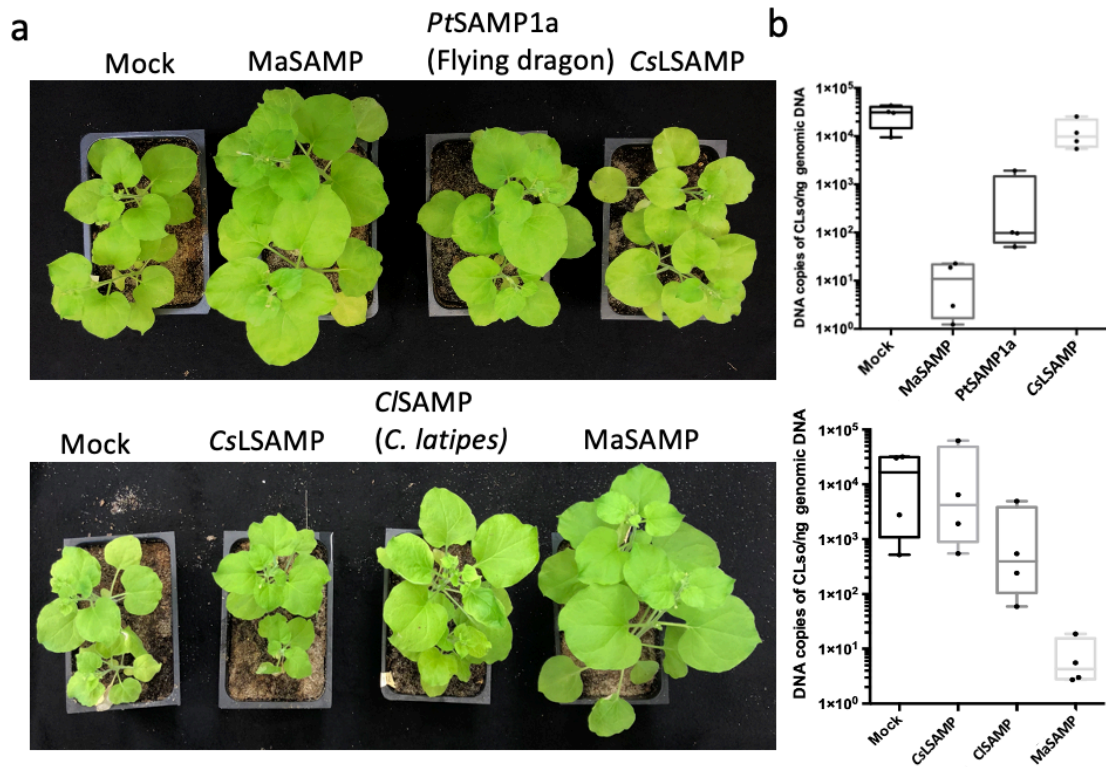

**Figure S3. Screening for the most effective SAMP using the *Nb*/CLso growth assay.**

- a. The CLso infected *Nb* plants injected with different SAMPs after 4 weeks.
- b. The CLso titer in the *Nb* plants showed in (a). Six leaves were collected from each plant for DNA extraction. Four plants were evaluated for each treatment. The CLso titer was analyzed by qPCR.

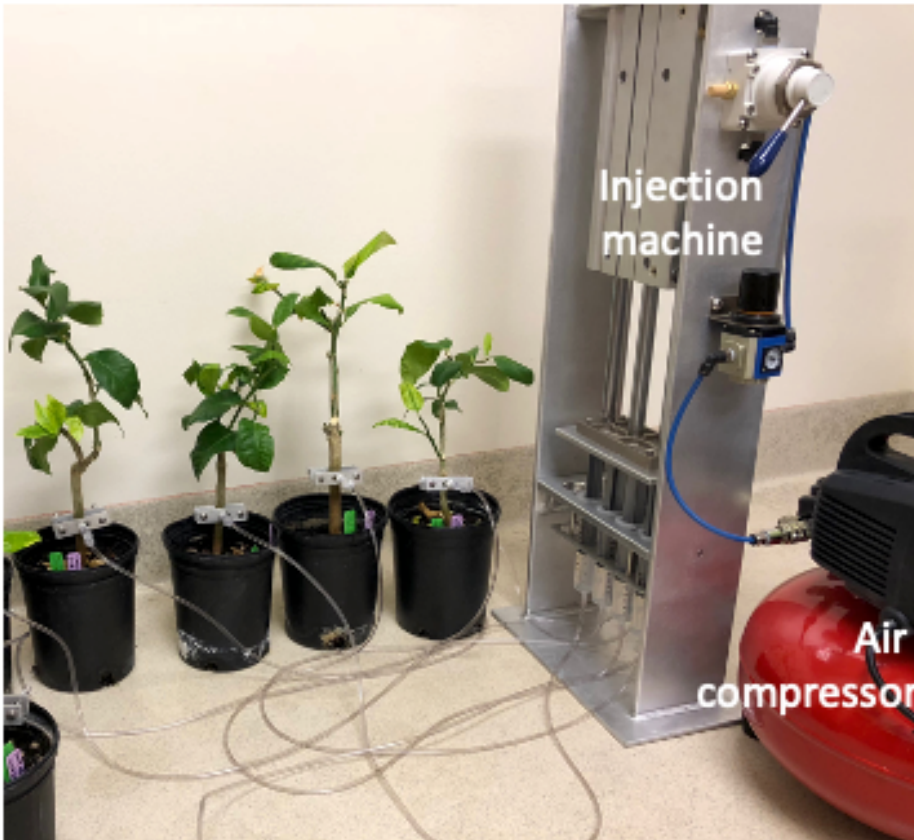

**Figure S4. Pneumatic trunk injection system used to deliver solution into the vasculature of the citrus trees.**

The system allows for an accurate amount of solution to be injected into trees in a period of time under control pressure. The air compressor is connected to the injection machine which pushes syringes connected to trees with tubes.

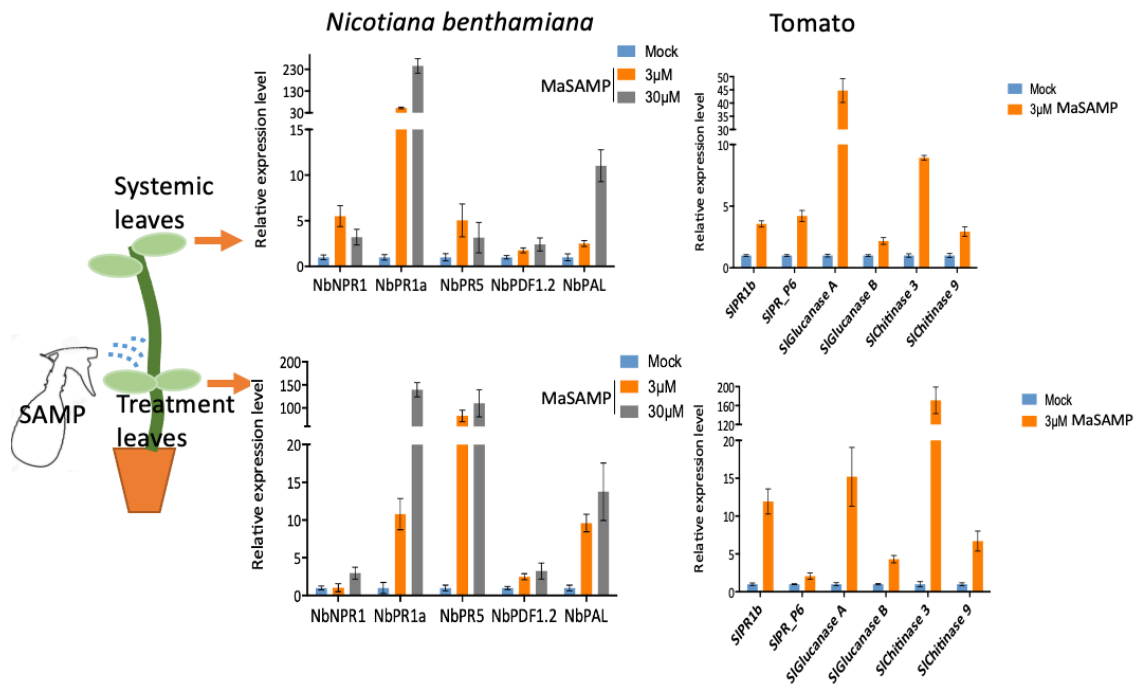

**Figure S5. The defense marker genes were induced in *Nb* and tomato post MaSAMP treatment.**

The expression levels of defense marker genes in the MaSAMP treated leaves (lower panel) and the systemic leaves (upper panel) of *Nb* and tomato. The relative expression level was analyzed by qRT-PCR and normalized to *Ubiquitin*.

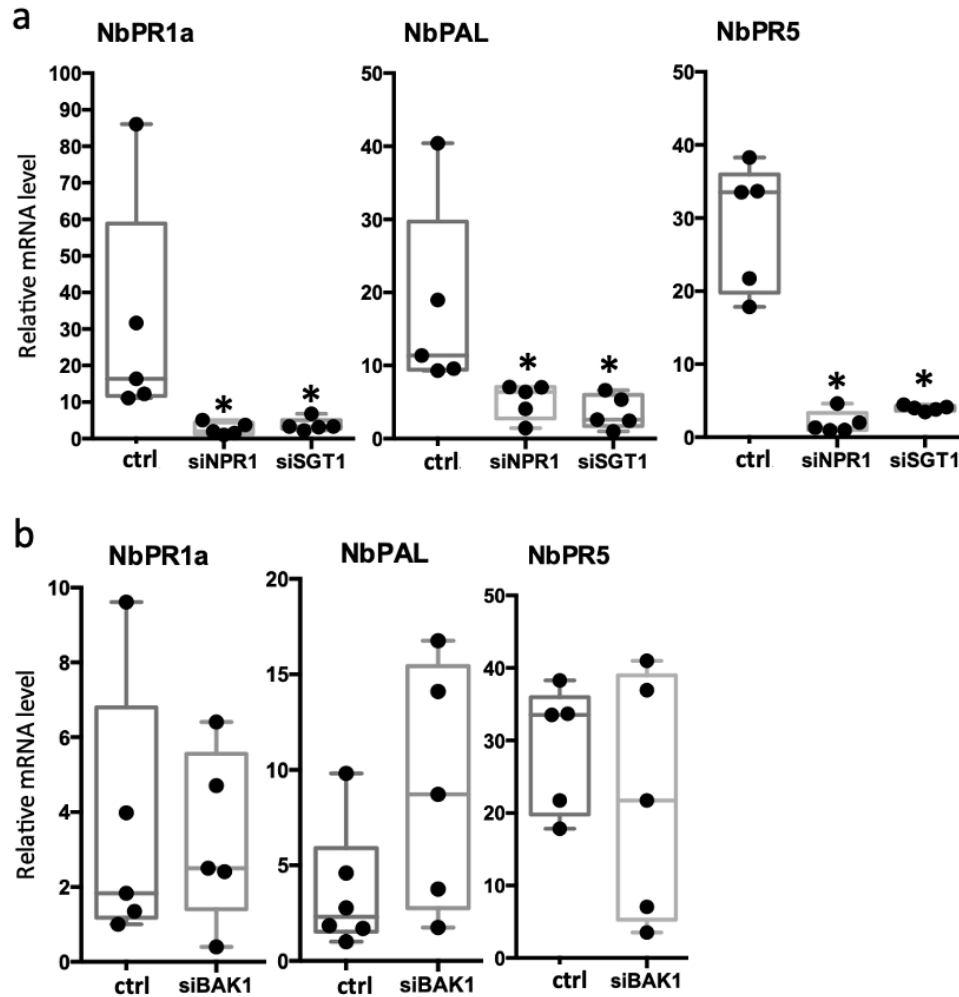

**Figure S6. The immune responses activated by MaSAMP is dependent on *NPR1* and *SGT1*, but not *BAK1*.**

a and b. Expression level of defense response genes *PR1a*, *PAL* and *PR5* in *Nb* plants at 20 hours post MaSAMP foliar spray treatment were analyzed by qRT-PCR and normalized to *Ubiquitin* gene (*NbUbi*). Two leaflets per plants were collected and five plants per treatment were used. Data are shown as means  $\pm$  SE. Significant difference was determined by

ANOVA Dunnett's multiple comparisons test, compared to siBR ( $*P < 0.05$ ), the non-target vector control (ctrl).

**a**

|         | MaSAMP detected in midribs of 20 leaves ( $\mu\text{g}$ ) | Vascular fluid collected ( $\mu\text{l}$ ) | MaSAMP concentration ( $\mu\text{M}$ ) |
|---------|-----------------------------------------------------------|--------------------------------------------|----------------------------------------|
| Sample1 | 1.30                                                      | 10                                         | 22                                     |
| Sample2 | 1.09                                                      | 15                                         | 12                                     |
| Sample3 | 1.06                                                      | 18                                         | 9.8                                    |

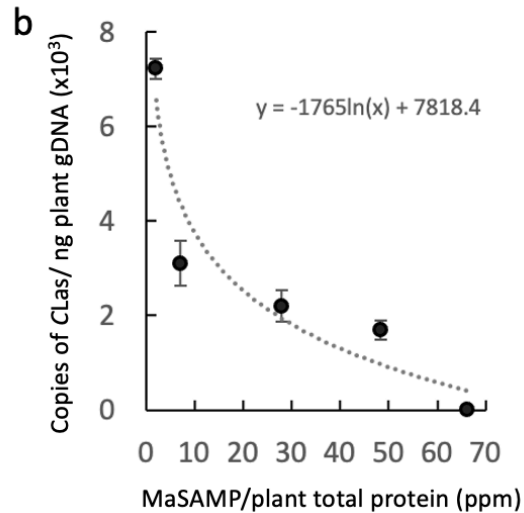

**Figure S7. The MaSAMP level in leaf midribs is negatively correlated with the CLAs titer.**

a. MaSAMP content in leaf midribs of ‘Madam Vinous’ sweet orange (*Citrus sinensis*) trees. The lower leaves were wiped with 135 $\mu\text{g}$  of MaSAMP at 10  $\mu\text{M}$  and the upper systemic leaves were collected for vascular fluid collection. MaSAMP levels were probed by western blot and quantified using ImageJ. b. The amount of MaSAMP was negatively correlated with CLAs titer in the leaves of ‘Madam Vinous’ sweet orange trees after 6 weeks post foliar spray of MaSAMP. MaSAMP was detected by western blot after

immunoprecipitation with anti-SAMP antibodies and quantified using ImageJ. The CLas titer was detected by qPCR.

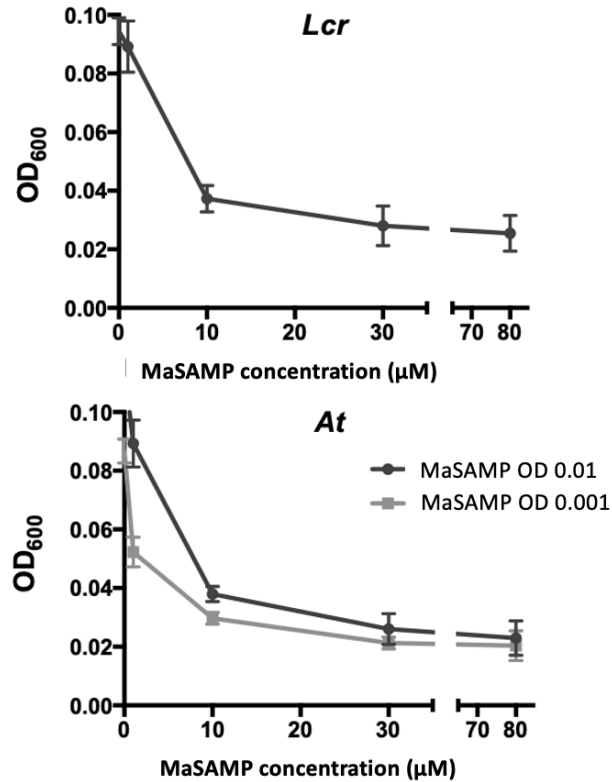

**Figure S8. The minimum inhibitory concentration of MaSAMP is between 10 μM to 30 μM.**

Bacteria growth assay of different concentrations of MaSAMP with *Lcr* and *At*. The initial culture of *Lcr* was started at OD<sub>600</sub> 0.01 and evaluated after 4 days of growth at 25°C. The initial culture of *At* was started at OD<sub>600</sub> 0.01 or 0.001 in Agrobacterium minimal medium and evaluated after 4 days of growth at 28°C.



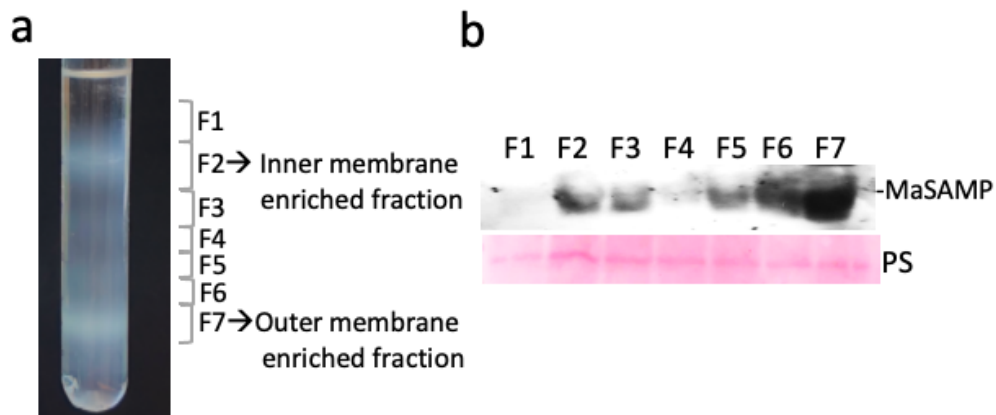

**Figure S9. MaSAMP is mainly associated with the membrane fraction from *Lcr*.**

a. The fraction separation of membrane from *Lcr* after ultracentrifugation. The fraction was collected according to the labeling F1 to F7.

b. MaSAMP was detected by immunoblot with anti-SAMP antibody in different fractions indicated in (a). Ponceas staining (PS) was used as loading control.

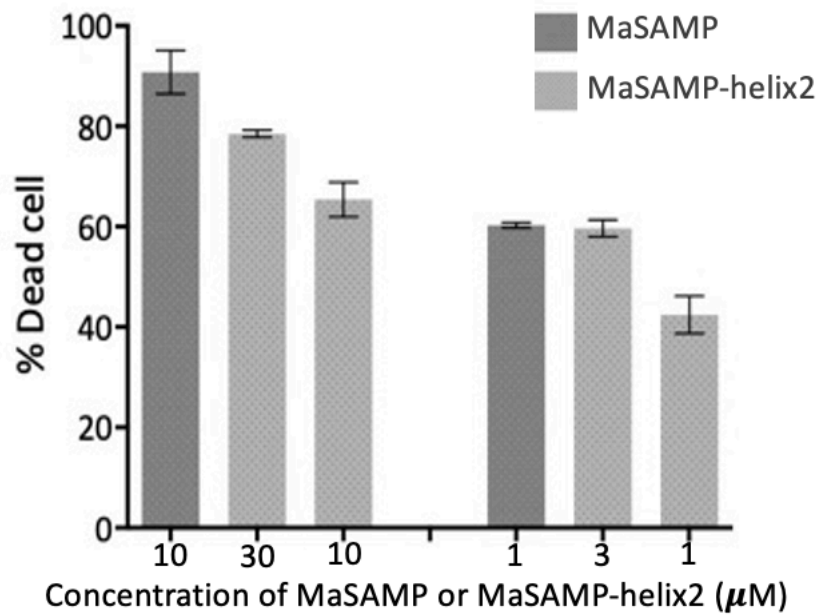

**Figure S10. Tripling the amount of MaSAMP-helix2 can reach 90% of the antibacterial activity of MaSAMP.** Antibacterial activity testing of different concentrations of MaSAMP and MaSAMP-helix2 using *Lcr* viability/cytotoxic assays.

Table S1. Primer list

| Primer                                               | Sequence 5'→3'                            |                |
|------------------------------------------------------|-------------------------------------------|----------------|
| For citrus genes relative expression level detection |                                           |                |
| CsPR1qRTF                                            | GACCGATGAGATGGGACAAC                      |                |
| CsPR1qRTR                                            | GTAAGGCCGTTTACCAGCA                       |                |
| CsPR2qRTF                                            | TCCACTGCCATCGAAACTG                       |                |
| CsPR2qRTR                                            | GTAATCTTGTTTAAATGAGCCTCTTG                |                |
| CsPAL1rtF                                            | CTCGGCCCTCAGATCGAA                        |                |
| CsPAL1rtR                                            | CCGAGTTGATCTCCCGTTC                       |                |
| SAMPrtF                                              | AACAGGGGCAAGAATGTGAGCAT                   |                |
| SAMPrtR                                              | ACACGTACTGTTGTCGGTTTGTAGTCA               |                |
| CsUbiF                                               | ACCATCGACAATGTCAAGGC                      |                |
| CsUbiR                                               | CCTTTTGGATGTTGTATTGCGC                    |                |
| For <i>Sj</i> genes relative expression level        |                                           |                |
| SIGluA_rtF                                           | CTTTACTTGTGGGCTTCT                        |                |
| SIGluA_rtR                                           | ACTTCCTTGAGGGCATT                         |                |
| SIGluB_rtF                                           | GGACAGATTTCACTTCGGTAT                     |                |
| SIGluB_rtR                                           | CCAAAAGCACCAGCAGA                         |                |
| SIChi9_rtF                                           | GGAAGAGCCATTGGAGTG                        |                |
| SIChi9_rtR                                           | GCTTTGGGGATTGAGGA                         |                |
| SIChi3_rtF                                           | ACGCCATCCCCTAAAGA                         |                |
| SIChi3_rtR                                           | TGGACCCATCCCACATT                         |                |
| SIPR1b1_rtF                                          | CATCCCGAGCACAAAAC                         |                |
| SIPR1b1_rtR                                          | TGAAGTCACCACCACCT                         |                |
| SIPR-P6_rtF                                          | GTACTGCATCTTCTTGTTC                       |                |
| SIPR-P6_rtR                                          | TAGATAAGTGCTTGATGTGCC                     |                |
| SIEF_rtF                                             | GATTGGTGGTATTGGAAGTGC                     |                |
| SIEF_rtR                                             | AGCTTCGTGGTGCATCTC                        |                |
| For <i>Nb</i> genes relative expression level        |                                           |                |
| NbPR1a_rtF                                           | CCTCGTACATTCTCATGGTC                      |                |
| NbPR1a_rtR                                           | ATTGTTACTGAACCCTAGC                       |                |
| NbPR5_rtF                                            | CCGAGGTAATTGTGAGACTGGAG                   |                |
| NbPR5_rtR                                            | CCTGATTGGGTTGATTAAGTGC                    |                |
| NbPDF1.2_rtF                                         | GGAAATGGCAAACCTCATGCG                     |                |
| NbPDF1.2_rtR                                         | TCCTTCGGTCAGACAAACG                       |                |
| NbNPR1_rtF                                           | CATCAGCGGAAGCAGTAG                        |                |
| NbNPR1_rtR                                           | GTCGGCGAAGTAGTCAAAC                       |                |
| NbPAL_rtF                                            | TTATGCTCTTAGAACGTCGCCC                    |                |
| NbPAL_rtR                                            | CCGTGTAATGCCTTGTTTCTTG                    |                |
| For SAMP genes cloning                               |                                           |                |
| SAMP_S_CACC                                          | <u>C</u> ACCATGTGCTGCAACAGGGGCAAGA        | pEntry cloning |
| SAMP_L_CACC                                          | <u>C</u> ACCATGGAAGAAGCTAAAGGAGTGGTGAAG   | pEntry cloning |
| SAMP_R                                               | CTACTAGTACAACCTCAGACACG                   | pEntry cloning |
| SAMP_S_SaIF                                          | TACGCGTCGACTGTGCTGCAACAGGGGCAAGAATG       | pET28a cloning |
| SAMP_L_SaIF                                          | TACGCGTCGACTGGAAGAAGCTAAAGGAGTGGTGAAG     | pET28a cloning |
| SAMP_R_XhoI                                          | ATCCGCTCGAGTCAGACACGTAAGTGTGCGG           | pET28a cloning |
| For NbNPR1 VIGS                                      |                                           |                |
| NbsiNPR1_attB1                                       | AAAAAGCAGGCTTC TACTGGATATTCTTGACAAAATTGC  |                |
| NbsiNPR1_attB2                                       | AGAAAGCTGGGTGTTA GCAACATCTGCAGTAATTCAACAT |                |

## SI References

1. M. G. Murray, W. F. Thompson, Rapid isolation of high molecular weight plant DNA. *Nucleic acids research* **8**, 4321-4325 (1980); published online EpubOct 10 (
2. H. Jin, M. J. Axtell, D. Dahlbeck, O. Ekwenna, S. Zhang, B. Staskawicz, B. Baker, NPK1, an MEKK1-like Mitogen-Activated Protein Kinase Kinase Kinase, Regulates Innate Immunity and Development in Plants. *Developmental cell* **3**, 291-297 (2002); published online Epub2002/08/01/ ([https://doi.org/10.1016/S1534-5807\(02\)00205-8](https://doi.org/10.1016/S1534-5807(02)00205-8)).
3. S. Chakravarthy, S. K. Velásquez Ac Fau - Ekengren, A. Ekengren Sk Fau - Collmer, G. B. Collmer A Fau - Martin, G. B. Martin, Identification of *Nicotiana benthamiana* genes involved in pathogen-associated molecular pattern-triggered immunity.
4. J. Song, J. M. Bradeen, S. K. Naess, J. A. Raasch, S. M. Wielgus, G. T. Haberlach, J. Liu, H. Kuang, S. Austin-Phillips, C. R. Buell, J. P. Helgeson, J. Jiang, Gene RB cloned from *Solanum bulbocastanum* confers broad spectrum resistance to potato late blight. *Proceedings of the National Academy of Sciences of the United States of America* **100**, 9128-9133 (2003); published online EpubAug 5 (10.1073/pnas.1533501100).
5. N. Fernandez-Pozo, H. G. Rosli, G. B. Martin, L. A. Mueller, The SGN VIGS tool: user-friendly software to design virus-induced gene silencing (VIGS) constructs for functional genomics. *Mol Plant* **8**, 486-488 (2015); published online EpubMar (10.1016/j.molp.2014.11.024).
6. P. Marani, S. Wagner, L. Baars, P. Genevaux, J. W. de Gier, I. Nilsson, R. Casadio, G. von Heijne, New *Escherichia coli* outer membrane proteins identified through prediction and experimental verification. *Protein science : a publication of the Protein Society* **15**, 884-889 (2006); published online EpubApr (10.1110/ps.051889506).
7. C. Schneider, W. Rasband, K. Eliceiri, NIH Image to ImageJ: 25 years of imageanalysis. *Nat Methods* **9**, 671-675 (2012)
